# Supplementary material for: Cortical excitability controls the strength of mental imagery
Source: eLife. 2020 May 5;9:e50232. doi: 10.7554/eLife.50232 (PMC7200162; doi:10.7554/eLife.50232)
Supplement: Figure 2—figure supplement 1—source data 1. [file elife-50232-fig2-figsupp1-data1.csv]

Number	Subj	Gender	Age	t1t2_priming	t1t2_ave_vividness	t1t2_mockprimed	Z_score_Rest_2TR_V1	Z_score_Rest_2TR_V2	Z_score_Rest_2TR_V3	t1t2_surf_wholeBrain (mm2)	t1t2_vol_wholeBrain	t1t2_thick_wholeBrain (mm)	EuklidDistance_V1_supfront	Z_score_Rest_2TR_lateraloccipital_overlap_with_functionalV1V2V3excluded	Z_score_Rest_2TR_superiorfrontal	Z_score_Rest_2TR_parsorpercularis	Rest_2TR_V1_superiorfrontal‎_ratio	Z_score_Rest_2TR_bankssts	Z_score_Rest_2TR_caudalanteriorcingulate	Z_score_Rest_2TR_caudalmiddlefrontal	Z_score_Rest_2TR_cuneus_overlap_with_functionalV1V2V3excluded	Z_score_Rest_2TR_enthorhinal	Z_score_Rest_2TR_fusiform	Z_score_Rest_2TR_frontalpole	Z_score_Rest_2TR_inferiortemporal	Z_score_Rest_2TR_inferiorparietal	Z_score_Rest_2TR_insula	Z_score_Rest_2TR_isthmuscingulate	Z_score_Rest_2TR_lateralorbitofrontal	Z_score_Rest_2TR_lingual_overlap_with_functionalV1V2V3excluded	Z_score_Rest_2TR_medialorbitofrontal	Z_score_Rest_2TR_middletemporal	Z_score_Rest_2TR_paracentral	Z_score_Rest_2TR_parahippocampal	Z_score_Rest_2TR_parsopercularis	Z_score_Rest_2TR_parsorbitalis	Z_score_Rest_2TR_parstriangularis	Z_score_Rest_2TR_pericalcarine_overlap_with_functionalV1V2V3excluded	Z_score_Rest_2TR_postcentral	Z_score_Rest_2TR_posteriorcingulate	Z_score_Rest_2TR_precentral	Z_score_Rest_2TR_precuneus_overlap_with_functionalV1V2V3excluded	Z_score_Rest_2TR_rostralanteriorcingulate	Z_score_Rest_2TR_rostralmiddlefrontal	Z_score_Rest_2TR_superiorparietal_overlap_with_functionalV1V2V3excluded	Z_score_Rest_2TR_superiortemporal	Z_score_Rest_2TR_supramarginal	Z_score_Rest_2TR_temporalpole	Z_score_Rest_2TR_transversetemporal
1	BKM30	2	36	57.85	2.3	50	0.96	1.19	1.12	190127.5	541752.5	2.52	44.4	1.14	0.42	0.3	2.3	0.69	0.29	0.39	1.07	-1.3	0.23	-1.22	-0.17	1.15	0.07	0.39	-0.25	0.62	-0.25	0.46	0.44	0.03	0.3	0.26	0.29	0.96	0.59	0.32	0.42	0.82	0.2	0.27	1.05	0.38	0.77	-0.57	0.35
2	CGA21	2	26	71.18	3.05	50	1.34	1.24	1.18	187747	557868	2.59	42.45	1.1	0.45	0.41	2.98	0.67	0.32	0.4	1.23	-1.25	0.01	-0.81	-0.27	1.22	0.09	0.35	-0.26	0.67	-0.26	0.33	0.49	-0.2	0.41	0.36	0.37	1.07	0.7	0.3	0.47	0.94	0.19	0.42	1.21	0.31	0.85	-0.94	0.37
3	CSN03	2	30	57.77	2.54	50	0.85	0.87	0.86	202236.5	565825.5	2.48	42.63	1.09	0.73	0.43	1.16	0.62	0.48	0.75	1	-1.21	-0.08	0.11	-0.55	1.28	0.1	0.26	-0.33	0.29	-0.19	0.13	0.71	-0.31	0.43	0.25	0.37	0.78	0.88	0.35	0.71	0.88	0.26	0.61	1.3	0.29	0.91	-1.28	0.33
4	FDN14	2	30	69.85	2.99	50	1.01	0.98	1.07	203109	575618	2.57	41.57	1.06	0.51	0.39	1.97	0.65	0.34	0.43	0.95	-0.8	0.26	-1.16	0.11	1.28	0.15	0.31	-0.53	0.51	-0.45	0.44	0.74	-0.22	0.39	-0.22	0.22	0.83	0.87	0.39	0.56	0.99	0.15	0.38	1.25	0.24	0.97	-0.83	0.28
5	GPS10	2	27	90.1	2.58	50	0.75	0.88	0.81	204087	568833	2.48	43.49	0.93	0.45	0.33	1.67	0.52	0.18	0.3	1.16	-0.47	0.24	0.25	0.17	1.16	0.09	0.27	-0.34	0.41	-0.24	0.49	0.58	0.01	0.33	0.07	0.22	0.87	0.65	0.23	0.42	0.91	0.17	0.33	1.24	0.26	0.72	-0.69	0.21
6	KHA29	1	26	93.33	3.06	50	0.93	0.8	0.97	159870.5	461715	2.51	40.18	0.93	0.69	0.5	1.36	0.73	0.41	0.67	1.08	-0.97	0.19	-0.96	-0.22	1.22	0.31	0.45	-0.41	0.51	-0.48	0.38	0.95	-0.08	0.5	0	0.34	0.86	0.84	0.56	0.71	1.07	0.23	0.42	1.27	0.33	0.91	-0.92	0.41
7	KKA06	1	25	74.25	2.9	50	0.94	1.29	1.24	185160	499928	2.4	42.65	1.24	0.4	0.33	2.37	0.71	0.26	0.33	1.12	-0.78	0.27	-0.36	0.08	1.24	0.12	0.23	-0.27	0.58	-0.42	0.56	0.42	-0.21	0.33	0.17	0.28	0.99	0.58	0.27	0.4	0.92	0.16	0.4	1.23	0.32	0.8	-0.67	0.3
8	MOA30	1	25	77.16	2.29	50	1.26	1.06	1.11	164311	485157.5	2.56	39.52	1.11	0.26	0.31	4.86	0.69	0.18	0.29	1.11	-0.53	0.15	-0.29	-0.35	1.16	0.15	0.39	-0.59	0.7	-0.55	0.28	0.38	0.22	0.31	0.03	0.23	1.02	0.63	0.26	0.39	0.89	0.01	0.17	1.03	0.36	0.81	-1.18	0.46
9	NMR26	2	29	62.62	2.81	50	1.14	1.17	1.23	180673.5	543128.5	2.62	43.5	1.19	0.52	0.44	2.2	0.6	0.36	0.49	0.99	-0.92	0.25	0.38	-0.06	1.23	0.2	0.31	-0.34	0.53	-0.07	0.4	0.51	-0.34	0.44	0.26	0.45	0.86	0.63	0.33	0.47	0.89	0.36	0.49	1.18	0.31	0.73	-1.11	0.4
10	RAA22	1	24	67.88	2.77	50				189213	570974	2.65
11	RCR06	1	25	58.24	2.63	50	0.85	0.96	0.98	172604.5	464631	2.4	41.8	0.99	0.46	0.26	1.85	0.51	0.25	0.31	1.29	-0.54	0.16	-0.15	-0.24	1.2	0.01	0.4	-0.47	0.52	-0.42	0.31	0.54	-0.13	0.26	-0.09	0.26	1.21	0.5	0.35	0.39	0.95	0.12	0.41	1.41	0.14	0.74	-0.64	0.24
12	SDA01	2	24	57.95	2.85	75	1.39	0.99	0.99	194342.5	564466.5	2.55	43.72	1.03	0.46	0.37	3	0.64	0.35	0.4	0.99	-0.76	0.16	-0.91	-0.08	1.12	0.23	0.21	-0.19	0.43	-0.34	0.38	0.44	-0.08	0.37	0.55	0.52	0.87	0.6	0.23	0.41	0.77	0.36	0.53	1.04	0.28	0.74	-0.59	0.28
13	STA17	1	31	79.66	2.91	50	0.77	0.88	0.87	174249.5	495753.5	2.5	40.05	0.94	0.55	0.54	1.4	0.85	0.47	0.63	1.12	-1.4	-0.42	-0.33	-0.8	1.37	0.32	0.35	-0.44	0.52	-0.13	0.29	0.74	-0.25	0.54	0.02	0.35	0.95	0.94	0.46	0.8	1.07	0.32	0.41	1.44	0.35	1.14	-1.58	0.57
14	TGA01	1	24	54.07	2.15	50	1.31	1.3	1.17	191794	556369	2.53	43.77	1.2	0.48	0.3	2.72	0.56	0.25	0.39	1.4	-0.53	0.21	-0.55	-0.03	1.27	0.14	0.39	-0.49	0.57	-0.48	0.29	0.54	-0.06	0.3	0.1	0.27	1.25	0.62	0.25	0.44	1	0.13	0.34	1.32	0.19	0.84	-1.03	0.27
15	GPS03	2	23	52.94	1.16	50	1.28	0.99	1.38	207720.5	618793	2.61	42.81	1.22	0.48	0.32	2.67	0.6	0.19	0.46	1.14	-0.58	0.18	-0.26	-0.05	1.32	0.12	0.26	-0.55	0.4	-0.28	0.33	0.49	-0.19	0.32	-0.03	0.32	0.89	0.7	0.23	0.51	0.86	0.18	0.36	1.3	0.31	0.96	-0.85	0.31
16	IMS13	2	30	49.17	2.72	50	1.08	1.14	1.16	182456	516777	2.51	41.3	1.18	0.48	0.26	2.27	0.55	0.22	0.37	1.23	-0.64	0.09	-0.13	-0.25	1.3	0.02	0.36	-0.39	0.48	-0.46	0.36	0.61	-0.23	0.26	0.21	0.27	1.1	0.66	0.3	0.47	1.11	0.09	0.42	1.39	0.2	0.73	-0.83	0.24
17	ARN28	1	24	71.72	2.24	50	0.73	1.05	1.16	155594	438529	2.5	39.57	1.1	0.61	0.43	1.19	0.67	0.45	0.54	1.12	-1.14	0.1	0.18	-0.13	1.22	0.25	0.42	-0.42	0.47	-0.34	0.45	0.79	-0.29	0.43	0.09	0.34	0.83	0.86	0.49	0.68	1	0.19	0.42	1.29	0.32	0.86	-1.39	0.44
18	CBA19	1	22	81.33	2.73	50	1.28	1.23	1.23	178806	500319	2.48	42.07	1.2	0.7	0.55	1.83	0.68	0.47	0.6	1.23	-0.92	0.15	-0.61	-0.32	1.19	0.15	0.39	-0.4	0.56	-0.33	0.26	0.59	0.02	0.55	0.22	0.48	1.14	0.68	0.38	0.66	0.98	0.35	0.6	1.2	0.33	0.81	-0.87	0.46
19	CSA11	1	18	43.99	1.03	50	1.3	1.37	1.3	186730	587153	2.75	42.41	1.22	0.58	0.54	2.23	0.71	0.44	0.51	1.15	-0.78	0.3	-0.18	0.04	1.09	0.32	0.43	-0.34	0.6	-0.32	0.48	0.45	-0.15	0.54	0.16	0.51	0.92	0.65	0.28	0.54	0.86	0.36	0.67	1.02	0.32	0.79	-1.1	0.46
20	DTI27	1	28	72.86	3.02	50	0.87	0.95	1.03	162748	485545	2.57	38.46	0.94	0.6	0.5	1.46	0.67	0.46	0.55	0.94	-0.45	0.24	-0.49	-0.13	0.97	0.16	0.4	-0.37	0.62	-0.42	0.36	0.37	-0.11	0.5	0.33	0.43	0.87	0.6	0.34	0.48	0.75	0.31	0.56	0.94	0.39	0.76	-0.68	0.44
21	EEI28	1	26	99.44	2.52	50	0.89	0.97	0.94	170884	499181	2.52	43.74	0.92	0.75	0.52	1.18	0.61	0.53	0.55	0.92	-0.56	0.21	0.33	0.07	0.99	0.26	0.36	-0.19	0.46	-0.12	0.45	0.46	-0.11	0.52	0.56	0.62	0.79	0.62	0.36	0.51	0.72	0.57	0.85	0.87	0.38	0.81	-0.68	0.41
22	EKI30	2	22	86.49	2.64	50	0.44	0.64	0.98	226812	660953	2.59	45.4	1.01	0.56	0.44	0.78	0.7	0.32	0.51	1.03	-1.26	0.08	0.47	-0.21	1.22	0.01	0.23	-0.66	0.36	-0.19	0.41	0.43	-0.41	0.44	-0.46	0.34	0.7	0.69	0.22	0.53	0.76	0.21	0.43	1.11	0.37	0.87	-0.88	0.37
23	EKN23	2	28	94.64	3.32	50	1.15	1.02	1.08	206943	611897	2.59	43.07	1.01	0.65	0.47	1.77	0.46	0.36	0.44	0.97	-1.07	0.17	-0.12	0.07	1.01	0.03	0.29	-0.13	0.5	-0.03	0.41	0.44	-0.23	0.47	0.18	0.59	0.94	0.6	0.24	0.39	0.73	0.41	0.73	1.07	0.25	0.69	-0.56	0.24
24	EMP05	2	24	74.06	2.08	50	1.26	1.07	1.08	202843	556551	2.45	41.83	1.07	0.65	0.53	1.93	0.67	0.45	0.55	0.92	-1.17	0.06	-0.38	-0.07	1.09	0.24	0.28	-0.35	0.52	-0.23	0.29	0.42	-0.17	0.53	0.37	0.63	0.77	0.62	0.31	0.53	0.81	0.39	0.68	1.02	0.26	0.8	-1.12	0.34
25	MLN03	1	26	79.34	2.47	55	1.01	1.19	1.13	156112	445952	2.5	41.43	0.96	0.74	0.48	1.37	0.66	0.6	0.62	1.13	-1.15	0.02	-0.15	-0.14	1.15	0.33	0.41	-0.4	0.56	-0.23	0.36	0.71	0.07	0.48	0.03	0.4	1.02	0.72	0.5	0.62	1.09	0.42	0.48	1.32	0.21	0.81	-1.13	0.4
26	MMZ19	1	22	86.18	2.69	50	0.63	0.88	0.84	185563	514572	2.48	43.58	0.79	0.89	0.69	0.7	0.53	0.58	0.61	0.95	-0.65	-0.04	0.74	-0.06	0.94	0.34	0.16	-0.12	0.37	-0.05	0.42	0.38	-0.03	0.69	0.69	0.86	0.77	0.63	0.31	0.56	0.69	0.71	0.98	0.9	0.41	0.75	-0.94	0.38
27	MSA02	1	25	68.43	2.5	50	1.24	1.42	1.27	173050	501084	2.53	40.67	1.14	0.5	0.47	2.46	0.75	0.49	0.47	1.16	-1.31	0.17	-0.05	-0.37	1.13	0.07	0.37	-0.51	0.54	-0.2	0.21	0.54	-0.08	0.47	-0.06	0.31	0.91	0.7	0.38	0.55	0.96	0.33	0.45	1.2	0.29	0.91	-1.46	0.44
28	SCD01	2	29	89.85	3.32	50	0.77	1.1	1.03	176509	529466	2.65	42.71	1.1	0.73	0.42	1.06	0.69	0.41	0.66	0.94	-1.07	0.04	0.59	-0.2	1.22	0.21	0.41	-0.44	0.42	-0.3	0.29	0.64	0.02	0.42	0.09	0.38	0.83	0.69	0.4	0.56	1.03	0.2	0.65	1.21	0.35	0.85	-1.2	0.41
29	SEA16	1	23	50.54	3.14	50	1.07	1.15	0.98	171889	447536	2.3	41.12	0.97	0.7	0.57	1.54	0.6	0.45	0.47	0.97	-0.39	0.15	-0.24	-0.17	0.97	0.38	0.34	0.07	0.53	0.33	0.38	0.52	-0.15	0.57	0.41	0.56	0.91	0.59	0.44	0.5	0.75	0.56	0.67	0.89	0.4	0.72	-0.34	0.47
30	WWY06	1	22	52.22	2.11	50	1.1	1.15	1.16	174173	509105	2.55	41.58	1.01	0.41	0.24	2.71	0.6	0.32	0.36	1.07	-1.15	0.23	-0.34	-0.09	1.04	0.03	0.24	-0.37	0.49	-0.23	0.43	0.48	-0.26	0.24	0.02	0.19	0.81	0.66	0.32	0.4	0.82	0.23	0.41	1.18	0.23	0.67	-1.59	0.3
31	KVA20	1	26	65	2.61	50	1.27	1.13	1.01	175026	470832	2.4	43.05	0.94	0.45	0.31	2.82	0.49	0.23	0.31	0.94	-1.11	0.16	-0.83	-0.11	0.9	0.02	0.16	-0.58	0.42	-0.62	0.24	0.32	-0.17	0.31	0.17	0.33	0.85	0.53	0.18	0.33	0.67	0.07	0.5	1	0.2	0.59	-0.86	0.26
32	BPA04	1	28	60.09	3.17	50	1.01	1.07	1.28	152002	403526	2.35	38.43	1.08	0.51	0.51	1.98	0.82	0.51	0.46	1.08	-0.98	0.36	-0.61	0.12	1.17	0.3	0.48	-0.35	0.71	-0.39	0.53	0.61	-0.04	0.51	0.23	0.5	1.18	0.68	0.44	0.53	0.94	0.15	0.57	1.05	0.4	0.86	-1.05	0.51
[truncated: 26 more columns]
