# Supplementary material for: Cortical excitability controls the strength of mental imagery
Source: eLife. 2020 May 5;9:e50232. doi: 10.7554/eLife.50232 (PMC7200162; doi:10.7554/eLife.50232)
Supplement: Figure 3—source data 1. [file elife-50232-fig3-data1.csv]

Inverse PT	Imagery Strength
44	50
40	62.5
30	58.3
42	76.92
39	47.37
38	56.41
37	59.52
32	60.83
26	80
45	48
49	62.5
34	85.71
31	63.41
42	69.23
39	76.19
38	75
26	92.98
40	55
54	62
48	50
16	88.34
27	55.365
42	59.54
34	52.78
43	46.16
55	54.17
39	52.5
50	79.49
26	71
40	64.705
36	72.22
40	72
