# Supplementary material for: Cortical excitability controls the strength of mental imagery
Source: eLife. 2020 May 5;9:e50232. doi: 10.7554/eLife.50232 (PMC7200162; doi:10.7554/eLife.50232)
Supplement: Figure 4—source data 1. [file elife-50232-fig4-data1.csv]

subject	tDCS	block	imagery	order
1	1	1	-0.129514563	0
2	1	1	-0.090909091	0
3	1	1	0.201803833	0
4	1	1	0.002150538	0
5	1	1	0.223590831	0
6	1	1	0.231609002	0
7	1	1	-0.039970461	0
8	1	1	0.416635416	0
9	1	1	0.384657989	0
10	1	1	0.149645526	1
11	1	1	0.143863452	1
12	1	1	0.237387237	1
13	1	1	0.249543147	1
14	1	1	0.069764197	1
15	1	1	0.125450679	1
16	1	1	-0.055559849	1
1	1	2	-0.098446602	0
2	1	2	-0.059636364	0
3	1	2	0.182535615	0
4	1	2	0.028305725	0
5	1	2	-0.075454768	0
6	1	2	0.100268727	0
7	1	2	0.123788424	0
8	1	2	0.058876472	0
9	1	2	0.076986984	0
10	1	2	0.30024909	1
11	1	2	-0.096902375	1
12	1	2	-0.198128968	1
13	1	2	0.203248731	1
14	1	2	-0.116366681	1
15	1	2	0.232689285	1
16	1	2	0.030368596	1
1	1	3	0.071262136	0
2	1	3	0.010181818	0
3	1	3	-0.132725223	0
4	1	3	-0.128160418	0
5	1	3	-0.099926585	0
6	1	3	-0.015451797	0
7	1	3	-0.384657989	0
8	1	3	-0.205880147	0
9	1	3	0.076986984	0
10	1	3	-0.178769879	1
11	1	3	0.023570848	1
12	1	3	0.002338791	1
13	1	3	-0.052385787	1
14	1	3	-0.202734757	1
15	1	3	-0.229546085	1
16	1	3	-0.141333745	1
1	1	4	0.071262136	0
2	1	4	-0.209454545	0
3	1	4	-0.010351542	0
4	1	4	-0.14757338	0
5	1	4	-0.238600212	0
6	1	4	-0.015451797	0
7	1	4	0.230868642	0
8	1	4	7.50E-05	0
9	1	4	-0.153835503	0
10	1	4	0.219390688	1
11	1	4	-0.314910142	1
12	1	4	-0.164717675	1
13	1	4	-0.299898477	1
14	1	4	-0.23022185	1
15	1	4	0.125265785	1
16	1	4	0.09095124	1
1	2	1	-0.267130817	0
2	2	1	-0.216436127	0
3	2	1	-0.03466377	0
4	2	1	-0.154112554	0
5	2	1	0.1034	0
6	2	1	-0.107674004	0
7	2	1	-0.079272363	0
8	2	1	0.338128293	0
9	2	1	0.2592	0
10	2	1	-0.0440553	1
11	2	1	0.118839992	1
12	2	1	0.242895036	1
13	2	1	-0.165779713	1
14	2	1	-0.056659308	1
15	2	1	0.180555556	1
16	2	1	0.058746523	1
1	2	2	-0.120556981	0
2	2	2	-0.244426363	0
3	2	2	-0.094940719	0
4	2	2	0.030735931	0
5	2	2	0	0
6	2	2	0.062314099	0
7	2	2	-0.054105474	0
8	2	2	0.31420925	0
9	2	2	-0.037066667	0
10	2	2	0.253456221	1
11	2	2	0.15879132	1
12	2	2	-0.090564608	1
13	2	2	-0.223512337	1
14	2	2	-0.207562121	1
15	2	2	-0.131944444	1
16	2	2	0.090983472	1
1	2	3	-0.162477098	0
2	2	3	-0.035638731	0
3	2	3	-0.126074758	0
4	2	3	-0.072294372	0
5	2	3	0	0
6	2	3	0.140243902	0
7	2	3	-0.054238985	0
8	2	3	-0.016141173	0
9	2	3	-0.037066667	0
10	2	3	-0.046635945	1
11	2	3	-0.053538836	1
12	2	3	-0.129973475	1
13	2	3	-0.247379455	1
14	2	3	-0.283070131	1
15	2	3	-0.33125	1
16	2	3	0.181476027	1
1	2	4	-0.158666178	0
2	2	4	-0.102196908	0
3	2	4	-0.188523848	0
4	2	4	-0.175468975	0
5	2	4	0	0
6	2	4	-0.107674004	0
7	2	4	-0.165554072	0
8	2	4	0.115162666	0
9	2	4	0.1852	0
10	2	4	-0.012534562	1
11	2	4	0.188805516	1
12	2	4	-0.111481622	1
13	2	4	-0.247379455	1
14	2	4	-0.219222279	1
15	2	4	-0.189861111	1
16	2	4	0	1
