# Supplementary material for: Cortical excitability controls the strength of mental imagery
Source: eLife. 2020 May 5;9:e50232. doi: 10.7554/eLife.50232 (PMC7200162; doi:10.7554/eLife.50232)
Supplement: Figure 4—source data 2. [file elife-50232-fig4-data2.csv]

subject	tDCS	block	imagery	order	order_order
1	1	1	0.468283013	1	c-a
2	1	1	-0.102897641	1	c-a
3	1	1	-0.006000185	0	a-c
4	1	1	-0.015844897	0	a-c
5	1	1	-0.111111111	1	c-a
6	1	1		1	c-a
7	1	1	0.04	0	a-c
8	1	1	-0.030363636	1	c-a
9	1	1	0.095859447	1	c-a
10	1	1		0	a-c
11	1	1	0.471670346	1	c-a
12	1	1	-0.229381191	0	a-c
13	1	1	0.104712584	0	a-c
14	1	1	-0.005766181	1	c-a
15	1	1	-0.1516	1	c-a
16	1	1	0.031246777	0	a-c
17	1	1		1	c-a
18	1	1		0	a-c
19	1	1	0.055925105	1	c-a
20	1	1	0.29982669	1	c-a
21	1	1	0.032086698	0	a-c
22	1	1	-0.103225806	1	c-a
23	1	1	0.340420719	1	c-a
24	1	1	0.002338853	1	c-a
25	1	1	0	0	a-c
26	1	1	-0.049569184	1	c-a
1	1	2	0.524855139	1	c-a
2	1	2	-0.102897641	1	c-a
3	1	2	0.364534293	0	a-c
4	1	2	0.049699833	0	a-c
5	1	2	0.104285714	1	c-a
6	1	2		1	c-a
7	1	2	0	0	a-c
8	1	2	0.272727273	1	c-a
9	1	2	-0.079009555	1	c-a
10	1	2		0	a-c
11	1	2	-0.014532745	1	c-a
12	1	2	0.016965774	0	a-c
13	1	2	0.035732781	0	a-c
14	1	2	0.057085195	1	c-a
15	1	2	0.0344	1	c-a
16	1	2	-0.217696195	0	a-c
17	1	2		1	c-a
18	1	2		0	a-c
19	1	2	0.267060852	1	c-a
20	1	2	-0.10355286	1	c-a
21	1	2	0	0	a-c
22	1	2	0.035222319	1	c-a
23	1	2	0.228681294	1	c-a
24	1	2	-0.136495463	1	c-a
25	1	2	-0.0344	0	a-c
26	1	2	0.04450076	1	c-a
1	1	3	0.219884111	1	c-a
2	1	3	0.141831883	1	c-a
3	1	3	0.153881658	0	a-c
4	1	3	-0.015844897	0	a-c
5	1	3	0.226507937	1	c-a
6	1	3		1	c-a
7	1	3	-0.0344	0	a-c
8	1	3	-0.151454545	1	c-a
9	1	3	0.027432446	1	c-a
10	1	3		0	a-c
11	1	3	-0.151030169	1	c-a
12	1	3	0.190742375	0	a-c
13	1	3	0.14282755	0	a-c
14	1	3	-0.304021911	1	c-a
15	1	3	0.0304	1	c-a
16	1	3	-0.033103022	0	a-c
17	1	3		1	c-a
18	1	3		0	a-c
19	1	3	0.2318305	1	c-a
20	1	3	0.195190641	1	c-a
21	1	3	0.124946876	0	a-c
22	1	3	-0.070095902	1	c-a
23	1	3	0.333936515	1	c-a
24	1	3	0.223313687	1	c-a
25	1	3	0.0344	0	a-c
26	1	3	-0.021186011	1	c-a
1	1	4	0.073040561	1	c-a
2	1	4	0.092132412	1	c-a
3	1	4	0.284408751	0	a-c
4	1	4	0.153823443	0	a-c
5	1	4	0.154444444	1	c-a
6	1	4		1	c-a
7	1	4	0.2	0	a-c
8	1	4	-0.124545455	1	c-a
9	1	4	0.095859447	1	c-a
10	1	4		0	a-c
11	1	4	-0.014532745	1	c-a
12	1	4	-0.188388742	0	a-c
13	1	4	0.035732781	0	a-c
14	1	4	-0.073230503	1	c-a
15	1	4	0.0304	1	c-a
16	1	4	0.091884088	0	a-c
17	1	4		1	c-a
18	1	4		0	a-c
19	1	4	0.304262134	1	c-a
20	1	4	0.29982669	1	c-a
21	1	4	-0.028686783	0	a-c
22	1	4	-0.053356582	1	c-a
23	1	4	0.172886979	1	c-a
24	1	4	0.047806156	1	c-a
25	1	4	0	0	a-c
26	1	4	0.188443994	1	c-a
1	2	1	0.153203021	1	c-a
2	2	1		1	c-a
3	2	1	0.032258065	0	a-c
4	2	1	-0.157752885	0	a-c
5	2	1		1	c-a
6	2	1	-0.145616642	1	c-a
7	2	1	0.202886929	0	a-c
8	2	1		1	c-a
9	2	1		1	c-a
10	2	1	-0.147131188	0	a-c
11	2	1	0.056774194	1	c-a
12	2	1		0	a-c
13	2	1	0.100722394	0	a-c
14	2	1	0.135165815	1	c-a
15	2	1	-0.091067117	1	c-a
16	2	1		0	a-c
17	2	1	-0.189178963	1	c-a
18	2	1	0.144688645	0	a-c
19	2	1		1	c-a
20	2	1	-0.13936387	1	c-a
21	2	1	0.032086698	0	a-c
22	2	1	-0.111219133	1	c-a
23	2	1	-0.058823529	1	c-a
24	2	1	0.018675722	1	c-a
25	2	1	-0.032226846	0	a-c
26	2	1	0.076376554	1	c-a
1	2	2	0.107074901	1	c-a
2	2	2		1	c-a
3	2	2	-0.209953917	0	a-c
4	2	2	0.010696538	0	a-c
5	2	2		1	c-a
6	2	2	0.127600297	1	c-a
7	2	2	-0.064354451	0	a-c
8	2	2		1	c-a
9	2	2		1	c-a
10	2	2	0.136108651	0	a-c
11	2	2	-0.388225806	1	c-a
12	2	2		0	a-c
13	2	2	-0.105675955	0	a-c
14	2	2	-0.161274629	1	c-a
15	2	2	0.121390633	1	c-a
16	2	2		0	a-c
17	2	2	-0.081157775	1	c-a
18	2	2	0.181522182	0	a-c
19	2	2		1	c-a
20	2	2	-0.13936387	1	c-a
21	2	2	0	0	a-c
22	2	2	0.055609566	1	c-a
23	2	2	-0.058823529	1	c-a
24	2	2	0.06295416	1	c-a
25	2	2	-0.032226846	0	a-c
26	2	2	-0.050255982	1	c-a
1	2	3	-0.108920025	1	c-a
2	2	3		1	c-a
3	2	3	-0.209953917	0	a-c
4	2	3	-0.213846543	0	a-c
5	2	3		1	c-a
6	2	3	0.127600297	1	c-a
7	2	3	0.136126704	0	a-c
8	2	3		1	c-a
9	2	3		1	c-a
10	2	3	0.018010038	0	a-c
11	2	3	-0.11016129	1	c-a
12	2	3		0	a-c
13	2	3	0.031991744	0	a-c
14	2	3	-0.099002676	1	c-a
15	2	3	-0.227426364	1	c-a
16	2	3		0	a-c
17	2	3	-0.135262959	1	c-a
18	2	3	0.05026455	0	a-c
19	2	3		1	c-a
20	2	3	-0.003278108	1	c-a
21	2	3	0.124946876	0	a-c
22	2	3	0.086719813	1	c-a
23	2	3	0.058823529	1	c-a
24	2	3	-0.126791171	1	c-a
25	2	3	-0.032226846	0	a-c
26	2	3	-0.016612684	1	c-a
1	2	4	0.014818659	1	c-a
2	2	4		1	c-a
3	2	4	0.044608295	0	a-c
4	2	4	-0.101659227	0	a-c
5	2	4		1	c-a
6	2	4	0.214338782	1	c-a
7	2	4	0.002405774	0	a-c
8	2	4		1	c-a
9	2	4		1	c-a
10	2	4	0.124692452	0	a-c
11	2	4	-0.13983871	1	c-a
12	2	4		0	a-c
13	2	4	-0.003508772	0	a-c
14	2	4	0.100462175	1	c-a
15	2	4	-0.072911637	1	c-a
16	2	4		0	a-c
17	2	4	-0.081157775	1	c-a
18	2	4	-0.118233618	0	a-c
19	2	4		1	c-a
20	2	4	-0.028262603	1	c-a
21	2	4	-0.028686783	0	a-c
22	2	4	0	1	c-a
23	2	4	-0.098	1	c-a
24	2	4	-0.144855688	1	c-a
25	2	4	-0.032226846	0	a-c
26	2	4	0.014940968	1	c-a
