# Supplementary material for: Cortical excitability controls the strength of mental imagery
Source: eLife. 2020 May 5;9:e50232. doi: 10.7554/eLife.50232 (PMC7200162; doi:10.7554/eLife.50232)
Supplement: Figure 4—source data 3. [file elife-50232-fig4-data3.csv]

subject	tDCS	block	imagery	order	order_order
1	1	1	59.39278937	2
2	1	1	-16.3952926	2
3	1	1	-21.21323529	1
4	1	1	-2.519619992	1
5	1	1	-1.136925358	0
6	1	1	-5.323076923	2
7	1	1	-0.618774525	1
8	1	1	29.22737307	0
9	1	1	36.84210526	1
10	1	1	22.23942629	0
11	1	1	3.996505787	0
12	1	1	0.995760623	2
13	1	1	22.83753097	0
14	1	1		1
15	1	1	8.833678399	2
16	1	1	7.369375	1
17	1	1	24.78372469	0
18	1	1	3.555180723	2
19	1	1	6.49627263	0
20	1	1		2
21	1	1		2
22	1	1		1
1	1	2	-2.29812355	2
2	1	2	15.13783653	2
3	1	2	5.036764706	1
4	1	2	7.393638992	1
5	1	2	31.82402373	0
6	1	2	0	2
7	1	2	-11.00211289	1
8	1	2	4.856512141	0
9	1	2	33.51578947	1
10	1	2	-20.59326868	0
11	1	2	9.194147194	0
12	1	2	18.30819284	2
13	1	2	-1.457989265	0
14	1	2		1
15	1	2	-9.937888199	2
16	1	2	45.595	1
17	1	2	24.78372469	0
18	1	2	-10.74481928	2
19	1	2	6.49627263	0
20	1	2		2
21	1	2		2
22	1	2		1
1	1	3	10.68943707	2
2	1	3	20.90923747	2
3	1	3	-3.713235294	1
4	1	3	-21.52003304	1
5	1	3	25.37815126	0
6	1	3	6.507692308	2
7	1	3	6.746151524	1
8	1	3	-3.090507726	0
9	1	3	5.263157895	1
10	1	3	8.662700676	0
11	1	3	12.3170998	0
12	1	3	-12.37306517	2
13	1	3	-9.676919901	0
14	1	3		1
15	1	3	4.377403135	2
16	1	3	-26.97125	1
17	1	3	10.06749691	0
18	1	3	-20.26481928	2
19	1	3	3.897763578	0
20	1	3		2
21	1	3		2
22	1	3		1
1	1	4	2.84629981	2
2	1	4	19.76463002	2
3	1	4	-16.83823529	1
4	1	4	-37.48038001	1
5	1	4	22.39248641	0
6	1	4	13.35384615	2
7	1	4	-8.647751283	1
8	1	4	26.13686534	0
9	1	4	5.263157895	1
10	1	4	-7.489202184	0
11	1	4	23.43306399	0
12	1	4	15.42936015	2
13	1	4	-9.676919901	0
14	1	4		1
15	1	4	-2.957704821	2
16	1	4	26.146875	1
17	1	4	13.05257154	0
18	1	4	-5.964819277	2
19	1	4	3.897763578	0
20	1	4		2
21	1	4		2
22	1	4		1
1	2	1	11.00738552	2
2	2	1	-10.08811365	2
3	2	1	-13.62051282	1
4	2	1	-16.81485872	1
5	2	1	-28.30683208	0
6	2	1	-6.564513321	2
7	2	1	-18.04958	1
8	2	1	-15.56841516	0
9	2	1	-16.1095636	1
10	2	1	-34.40380613	0
11	2	1	5.078204347	0
12	2	1	18.10335409	2
13	2	1	-15.95280126	0
14	2	1	10.41956099	1
15	2	1		2
16	2	1	-27.138	1
17	2	1	35.86956522	0
18	2	1	-8.69247626	2
19	2	1		0
20	2	1		2
21	2	1		2
22	2	1	-2.415	1
1	2	2	-1.22915805	2
2	2	2	11.05916202	2
3	2	2	7.692307692	1
4	2	2	-10.61055127	1
5	2	2	-23.29197973	0
6	2	2	-1.776075222	2
7	2	2	5.360923308	1
8	2	2	-4.405450812	0
9	2	2	-6.360259981	1
10	2	2	-29.37853107	0
11	2	2	-13.6705261	0
12	2	2	15.32830766	2
13	2	2	-24.7979188	0
14	2	2	0.722422895	1
15	2	2		2
16	2	2	-10.954	1
17	2	2	18.58695652	0
18	2	2	-23.95909423	2
19	2	2		0
20	2	2		2
21	2	2		2
22	2	2	-3.295	1
1	2	3	-4.861595273	2
2	2	3	7.894263622	2
3	2	3	-12.82051282	1
4	2	3	-5.907923335	1
5	2	3	-14.7649834	0
6	2	3	-36.28765454	2
7	2	3	-11.41159598	1
8	2	3	28.89677058	0
9	2	3	-6.360259981	1
10	2	3	-19.28337794	0
11	2	3	9.811090798	0
12	2	3	29.92461488	2
13	2	3	-11.51166032	0
14	2	3	-21.63100861	1
15	2	3		2
16	2	3	-15	1
17	2	3	0.347826087	0
18	2	3	0	2
19	2	3		0
20	2	3		2
21	2	3		2
22	2	3	-6.075	1
1	2	4	1.00901034	2
2	2	4	-3.1648984	2
3	2	4	-12.08205128	1
4	2	4	-10.7686228	1
5	2	4	-10.50148524	0
6	2	4	4.475013059	2
7	2	4	-6.549204398	1
8	2	4	18.38715699	0
9	2	4	-13.15691736	1
10	2	4	-19.93755575	0
11	2	4	16.06743855	0
12	2	4	17.22932372	2
13	2	4	-7.089101552	0
14	2	4	7.668796888	1
15	2	4		2
16	2	4	-22.735	1
17	2	4	19.04347826	0
18	2	4	2.447041636	2
19	2	4		0
20	2	4		2
21	2	4		2
22	2	4	1.815	1
1	3	1	-24.51405926	2
2	3	1	-22.71711996	2
3	3	1	15.86731026	1
4	3	1	6.721708696	1
5	3	1	-5.650210001	0
6	3	1	9.593931281	2
7	3	1	-4.404633621	1
8	3	1		0
9	3	1		1
10	3	1	-9.821652851	0
11	3	1	14.04421053	0
12	3	1	-16.71425852	2
13	3	1	-14.2881632	0
14	3	1	0.106780566	1
15	3	1	-1.409839298	2
16	3	1	-0.694053648	1
17	3	1	-9.074454957	0
18	3	1	-10.52	2
19	3	1		0
20	3	1	-6.890130354	2
21	3	1	-5.501889962	2
22	3	1		1
1	3	2	7.831666352	2
2	3	2	-36.07935882	2
3	3	2	-8.103111841	1
4	3	2	2.557659517	1
5	3	2	-3.352088121	0
6	3	2	-27.53235163	2
7	3	2	-2.033943966	1
8	3	2		0
9	3	2		1
10	3	2	13.15414887	0
11	3	2	-0.303684211	0
12	3	2	15.22939273	2
13	3	2	-22.44793006	0
14	3	2	0.920982381	1
15	3	2	-8.626639061	2
16	3	2	8.591258676	1
17	3	2	-15.50802139	0
18	3	2	22.58	2
19	3	2		0
20	3	2	5.453578079	2
21	3	2	-5.018899622	2
22	3	2		1
1	3	3	-5.642574071	2
2	3	3	-38.99618973	2
3	3	3	26.40443668	1
4	3	3	5.842232792	1
5	3	3	-24.92273556	0
6	3	3	-37.37914621	2
7	3	3	6.128771552	1
8	3	3		0
9	3	3		1
10	3	3	2.336096458	0
11	3	3	-0.139473684	0
12	3	3	-4.81629545	2
13	3	3	-14.2881632	0
14	3	3	-4.658302189	1
15	3	3	-18.24903875	2
16	3	3	1.012943163	1
17	3	3	-24.06417112	0
18	3	3	-13.06	2
19	3	3		0
20	3	3	16.67996808	2
21	3	3	2.309953801	2
22	3	3		1
1	3	4	-24.51405926	2
2	3	4	-30.19314151	2
3	3	4	5.473965287	1
4	3	4	15.04980705	1
5	3	4	-18.48799429	0
6	3	4	-13.89260747	2
7	3	4	12.85021552	1
8	3	4		0
9	3	4		1
10	3	4	-3.709285774	0
11	3	4	-2.253684211	0
12	3	4	1.979821055	2
13	3	4	-14.2881632	0
14	3	4	-4.658302189	1
15	3	4	-3.815439219	2
16	3	4	-6.208966423	1
17	3	4	-13.81324558	0
18	3	4	-8.58	2
19	3	4		0
20	3	4	37.44790281	2
21	3	4	2.309953801	2
22	3	4		1
