# Supplementary material for: Cortical excitability controls the strength of mental imagery
Source: eLife. 2020 May 5;9:e50232. doi: 10.7554/eLife.50232 (PMC7200162; doi:10.7554/eLife.50232)
Supplement: Figure 4—source data 4. [file elife-50232-fig4-data4.csv]

ID	change	Order	tdcs
1	6.12244898	1	1
2	1.81818182	0	1
3	0	1	1
4	13.4615385	0	1
5	0	1	1
6	10.6382979	0	1
7	4.34782609	0	1
8	-14.925373	0	1
9	7.40740741	1	1
10	5.66037736	0	1
11	2.12765957	1	1
12	9.25925926	0	1
13	-14.285714	1	1
14	-10.909091	0	1
15	4.22535211	0	1
16	-2	0	1
17	-3.030303	1	1
18	3.94736842	1	1
1	-8.474576271	1	2
2	2.083333333	0	2
3	5.714285714	1	2
4	-3.773584906	0	2
5	-5.882352941	1	2
6	5.555555556	0	2
7	4.255319149	0	2
8	-1.818181818	0	2
9	1.923076923	1	2
10	-6.779661017	0	2
11	0	1	2
12	-10.60606061	0	2
13	-1.785714286	1	2
14	-13.55932203	0	2
15	-7.8125	0	2
16	-6.12244898	0	2
17	-13.69863014	1	2
18	1.351351351	1	2
