# Supplementary material for: Cortical excitability controls the strength of mental imagery
Source: eLife. 2020 May 5;9:e50232. doi: 10.7554/eLife.50232 (PMC7200162; doi:10.7554/eLife.50232)
Supplement: Figure 5—source data 1. [file elife-50232-fig5-data1.csv]

subject	tDCS	block	imagery	order	order_order
1	1	1	0.139544778	0	a-c
2	1	1	0.010007322	1	c-a
3	1	1		0	a-c
4	1	1	0.084860174	1	c-a
5	1	1	0.146788991	0	a-c
6	1	1	-0.084130585	1	c-a
7	1	1	-0.162517239	1	c-a
8	1	1	-0.0286	0	a-c
9	1	1	0.080711567	1	c-a
10	1	1	0.325823034	1	c-a
11	1	1	0.2592	0	a-c
12	1	1	-0.190038181	1	c-a
13	1	1	0.042129749	0	a-c
14	1	1	0.632926695	0	a-c
15	1	1	0.0858	1	c-a
16	1	1	0.088139282	1	c-a
17	1	1	-0.099386096	1	c-a
18	1	1	-0.034593725	1	c-a
19	1	1		0	a-c
20	1	1	-0.081939325	1	c-a
21	1	1	0.015790024	0	a-c
22	1	1	-0.132961075	0	a-c
23	1	1		1	c-a
24	1	1	-0.055609566	0	a-c
25	1	1	-0.119033794	0	a-c
1	1	2	-0.08827909	0	a-c
2	1	2	-0.18639655	1	c-a
3	1	2		0	a-c
4	1	2	-0.035679846	1	c-a
5	1	2	0.068042813	0	a-c
6	1	2	0.127132853	1	c-a
7	1	2	-0.385787907	1	c-a
8	1	2	0.1176	0	a-c
9	1	2	-0.254253088	1	c-a
10	1	2	0.06048343	1	c-a
11	1	2	0.25	0	a-c
12	1	2	0.123047553	1	c-a
13	1	2	-0.020935642	0	a-c
14	1	2	0.357511814	0	a-c
15	1	2	0.0286	1	c-a
16	1	2	0.057018498	1	c-a
17	1	2	-0.325866932	1	c-a
18	1	2	-0.145132743	1	c-a
19	1	2		0	a-c
20	1	2	-0.027880163	1	c-a
21	1	2	-0.044023842	0	a-c
22	1	2	-0.223112406	0	a-c
23	1	2		1	c-a
24	1	2	-0.055609566	0	a-c
25	1	2	-0.109627221	0	a-c
1	1	3	0.033184429	0	a-c
2	1	3	-0.088764136	1	c-a
3	1	3		0	a-c
4	1	3	-0.20192864	1	c-a
5	1	3	0.158448012	0	a-c
6	1	3	-0.043692672	1	c-a
7	1	3	-0.222327067	1	c-a
8	1	3	0.1428	0	a-c
9	1	3	-0.198166706	1	c-a
10	1	3	0.116723176	1	c-a
11	1	3	0.2308	0	a-c
12	1	3	0.086948976	1	c-a
13	1	3	0.153915741	0	a-c
14	1	3	0.099021871	0	a-c
15	1	3	0.0286	1	c-a
16	1	3	0.125571273	1	c-a
17	1	3	-0.170399867	1	c-a
18	1	3	-0.094931617	1	c-a
19	1	3		0	a-c
20	1	3	0.000661563	1	c-a
21	1	3	-0.044023842	0	a-c
22	1	3	0.266650482	0	a-c
23	1	3		1	c-a
24	1	3	-0.055609566	0	a-c
25	1	3	0.011496923	0	a-c
1	1	4	0.094022548	0	a-c
2	1	4	-0.34911724	1	c-a
3	1	4		0	a-c
4	1	4	0.057666345	1	c-a
5	1	4	-0.100535168	0	a-c
6	1	4	-0.045665253	1	c-a
7	1	4	-0.30318647	1	c-a
8	1	4	0.0286	0	a-c
9	1	4	-0.246795619	1	c-a
10	1	4	-0.042983703	1	c-a
11	1	4	0.0322	0	a-c
12	1	4	-0.000694203	1	c-a
13	1	4	0.042258982	0	a-c
14	1	4	0.067589845	0	a-c
15	1	4	-0.0286	1	c-a
16	1	4	0.057018498	1	c-a
17	1	4	-0.099220176	1	c-a
18	1	4	-0.278680611	1	c-a
19	1	4		0	a-c
20	1	4	-0.027880163	1	c-a
21	1	4	0.204224616	0	a-c
22	1	4	-0.119689245	0	a-c
23	1	4		1	c-a
24	1	4	-0.313824616	0	a-c
25	1	4	-0.032284288	0	a-c
1	2	1	0.158044406	0	a-c
2	2	1		1	c-a
3	2	1	0.315256981	0	a-c
4	2	1		1	c-a
5	2	1	-0.140421264	0	a-c
6	2	1	-0.211542883	1	c-a
7	2	1	0.282403591	1	c-a
8	2	1	-0.136220618	0	a-c
9	2	1		1	c-a
10	2	1	-0.169537098	1	c-a
11	2	1	-0.007384615	0	a-c
12	2	1	0.344238634	1	c-a
13	2	1	0.171250186	0	a-c
14	2	1	0.124964845	0	a-c
15	2	1	0.11776817	1	c-a
16	2	1	0.176446366	1	c-a
17	2	1	0.001219377	1	c-a
18	2	1		1	c-a
19	2	1	-0.128236422	0	a-c
20	2	1	-0.123156411	1	c-a
21	2	1		0	a-c
22	2	1	0.087843833	0	a-c
23	2	1		1	c-a
24	2	1	0.066101825	0	a-c
25	2	1	-0.007754778	0	a-c
1	2	2	0.340697802	0	a-c
2	2	2		1	c-a
3	2	2	-0.190611089	0	a-c
4	2	2		1	c-a
5	2	2	-0.04480107	0	a-c
6	2	2	0.182570706	1	c-a
7	2	2	0.319043693	1	c-a
8	2	2	0.034240237	0	a-c
9	2	2		1	c-a
10	2	2	-0.252525253	1	c-a
11	2	2	0.025641026	0	a-c
12	2	2	0.374548954	1	c-a
13	2	2	0.136762301	0	a-c
14	2	2	-0.034030187	0	a-c
15	2	2	0	1	c-a
16	2	2	0	1	c-a
17	2	2	0.108524554	1	c-a
18	2	2		1	c-a
19	2	2	-0.103303984	0	a-c
20	2	2	-0.151526538	1	c-a
21	2	2		0	a-c
22	2	2	0.349107759	0	a-c
23	2	2		1	c-a
24	2	2	0.166192917	0	a-c
25	2	2	-0.007754778	0	a-c
1	2	3	0.029421415	0	a-c
2	2	3		1	c-a
3	2	3	0.079239174	0	a-c
4	2	3		1	c-a
5	2	3	0.050819124	0	a-c
6	2	3	0.652793746	1	c-a
7	2	3	0.15343043	1	c-a
8	2	3	-0.074588192	0	a-c
9	2	3		1	c-a
10	2	3	-0.086403604	1	c-a
11	2	3	0.124923077	0	a-c
12	2	3	0.676689921	1	c-a
13	2	3	-0.024379367	0	a-c
14	2	3	0.488890972	0	a-c
15	2	3	-0.176446366	1	c-a
16	2	3	0	1	c-a
17	2	3	0.108524554	1	c-a
18	2	3		1	c-a
19	2	3	-0.128236422	0	a-c
20	2	3	-0.0322217	1	c-a
21	2	3		0	a-c
22	2	3	0.232377009	0	a-c
23	2	3		1	c-a
24	2	3	0.207239044	0	a-c
25	2	3	-0.000793796	0	a-c
1	2	4	0.062452149	0	a-c
2	2	4		1	c-a
3	2	4		0	a-c
4	2	4		1	c-a
5	2	4	-0.140254096	0	a-c
6	2	4	0.254311336	1	c-a
7	2	4	-0.127599157	1	c-a
8	2	4	0.11049417	0	a-c
9	2	4		1	c-a
10	2	4	-0.335658746	1	c-a
11	2	4	-0.102564103	0	a-c
12	2	4	0.166225643	1	c-a
13	2	4	0.28839007	0	a-c
14	2	4	0.420455611	0	a-c
15	2	4	0.029442042	1	c-a
16	2	4	0	1	c-a
17	2	4	-0.087019177	1	c-a
18	2	4		1	c-a
19	2	4	-0.203033737	0	a-c
20	2	4	0.030342884	1	c-a
21	2	4		0	a-c
22	2	4	0.150152815	0	a-c
23	2	4		1	c-a
24	2	4	0.270673969	0	a-c
25	2	4	0.011906943	0	a-c
