# Supplementary material for: Cortical excitability controls the strength of mental imagery
Source: eLife. 2020 May 5;9:e50232. doi: 10.7554/eLife.50232 (PMC7200162; doi:10.7554/eLife.50232)
Supplement: Figure 5—source data 2. [file elife-50232-fig5-data2.csv]

subject	tDCS	block	imagery	order
1	1	1	21.96885428	0
2	1	1	-8.830801837	1
3	1	1	-12.12814645	0
4	1	1	23.35136161	1
5	1	1	2.713806898	2
6	1	1	0.847170451	0
7	1	1	3.825576713	2
8	1	1	-4.811963281	0
9	1	1	-33.74117647	1
10	1	1	17.18480733	0
11	1	1	21.28666036	1
12	1	1		1
13	1	1		2
14	1	1		1
15	1	1	3.928415539	2
16	1	1	13.43227148	1
17	1	1	-9.751219902	2
18	1	1	-16.94507637	1
19	1	1	-15.24254402	2
1	1	2	-25.84352985	0
2	1	2	14.85340869	1
3	1	2	8.023916734	0
4	1	2	-9.630894772	1
5	1	2	8.119796735	2
6	1	2	3.541172484	0
7	1	2	-17.81625726	2
8	1	2	-11.87444477	0
9	1	2	-6.635294118	1
10	1	2	-4.804577101	0
11	1	2	11.50155426	1
12	1	2		1
13	1	2		2
14	1	2		1
15	1	2	-6.460061109	2
16	1	2	9.367615086	1
17	1	2	-32.00543956	2
18	1	2	-18.7520312	1
19	1	2	-5.670140137	2
1	1	3	17.57508343	0
2	1	3	-8.830801837	1
3	1	3	-15.11035654	0
4	1	3	-22.80102477	1
5	1	3	2.97329441	2
6	1	3	1.660454083	0
7	1	3	-6.863027095	2
8	1	3	-25.96979568	0
9	1	3	-32.76862745	1
10	1	3	5.038946715	0
11	1	3	17.36721179	1
12	1	3		1
13	1	3		2
14	1	3		1
15	1	3	-2.997235559	2
16	1	3	13.43227148	1
17	1	3	-23.81409487	2
18	1	3	-7.143321417	1
19	1	3	1.444484369	2
1	1	4	17.57508343	0
2	1	4	-2.366654892	1
3	1	4	-6.045618956	0
4	1	4	8.928740867	1
5	1	4	0.205427614	2
6	1	4	-15.28295493	0
7	1	4	-4.504400851	2
8	1	4	-1.288125555	0
9	1	4	-21.56862745	1
10	1	4	-1.523402495	0
11	1	4	23.5707528	1
12	1	4		1
13	1	4		2
14	1	4		1
15	1	4	-13.40026189	2
16	1	4	0.444276397	1
17	1	4	-14.15086793	2
18	1	4	-17.90705232	1
19	1	4	-29.97484729	2
1	2	1	-8.340425532	0
2	2	1	-5.379685376	1
3	2	1	-6.522572239	0
4	2	1	-3.630306654	1
5	2	1	5.230202578	2
6	2	1	-10.0166021	0
7	2	1	13.00843722	2
8	2	1	6.773725122	0
9	2	1	-11.30547457	1
10	2	1	9.565083992	0
11	2	1	-18.21775469	1
12	2	1	-14.96228732	1
13	2	1	13.45814793	2
14	2	1	-16.05575632	1
15	2	1	46.06628387	2
16	2	1	-28.37443858	1
17	2	1	-4.354971241	2
18	2	1	35.15301902	1
19	2	1	-16.85354789	2
1	2	2	-12.8	0
2	2	2	11.67216935	1
3	2	2	-1.73986357	0
4	2	2	-10.08798155	1
5	2	2	3.296500921	2
6	2	2	5.404906844	0
7	2	2	15.91739076	2
8	2	2	-22.71290681	0
9	2	2	10.60900551	1
10	2	2	5.929278208	0
11	2	2	-24.70070025	1
12	2	2	2.315383266	1
13	2	2	-2.056922173	2
14	2	2	-5.351918775	1
15	2	2	34.32053994	2
16	2	2	-2.671184304	1
17	2	2	-17.39249521	2
18	2	2	30.59461447	1
19	2	2	15.80929556	2
1	2	3	1.310638298	0
2	2	3	-0.524373665	1
3	2	3	-19.70567947	0
4	2	3	-10.51507645	1
5	2	3	-12.30202578	2
6	2	3	1.014572957	0
7	2	3	3.891197582	2
8	2	3	-3.630306654	0
9	2	3	-13.08713962	1
10	2	3	7.386668712	0
11	2	3	-16.9527897	1
12	2	3	-9.629889493	1
13	2	3	6.859205776	2
14	2	3	-20.25468938	1
15	2	3	0.735368188	2
16	2	3	-5.444803404	1
17	2	3	-2.017712042	2
18	2	3	13.77630732	1
19	2	3	-11.23855174	2
1	2	4	-6.791489362	0
2	2	4	-7.749077491	1
3	2	4	-9.603740323	0
4	2	4	-21.15828137	1
5	2	4	-7.918968692	2
6	2	4	-14.51761668	0
7	2	4	-4.054904924	2
8	2	4	9.507132485	0
9	2	4	-9.167476514	1
10	2	4	31.47196441	0
11	2	4	-6.41517958	1
12	2	4	7.191720751	1
13	2	4	3.33305348	2
14	2	4	-13.9562898	1
15	2	4	17.5380276	2
16	2	4	-14.44330628	1
17	2	4	-26.08417785	2
18	2	4	12.08528628	1
19	2	4	3.757596508	2
1	3	1	4.181494662	0
2	3	1	-14.25454545	1
3	3	1	-9.955337848	0
4	3	1	7.32	1
5	3	1	-0.817648874	2
6	3	1	14.49456574	0
7	3	1		2
8	3	1	-8.541432321	0
9	3	1	2.499023819	1
10	3	1	2.853528254	0
11	3	1	0.955507357	1
12	3	1	13.62575453	1
13	3	1	10.65011434	2
14	3	1	-11.40623687	1
15	3	1	14.74230923	2
16	3	1		1
17	3	1	-12.68564942	2
18	3	1	-4.66886748	1
19	3	1	6.750208855	2
1	3	2	4.181494662	0
2	3	2	-14.25454545	1
3	3	2	-9.955337848	0
4	3	2	7.32	1
5	3	2	-0.817648874	2
6	3	2	14.49456574	0
7	3	2		2
8	3	2	-8.541432321	0
9	3	2	2.499023819	1
10	3	2	2.853528254	0
11	3	2	0.955507357	1
12	3	2	13.62575453	1
13	3	2	10.65011434	2
14	3	2	-11.40623687	1
15	3	2	14.74230923	2
16	3	2		1
17	3	2	-12.68564942	2
18	3	2	-4.66886748	1
19	3	2	6.750208855	2
1	3	3	6.761565836	0
2	3	3	-16.36363636	1
3	3	3	-27.96427028	0
4	3	3	4.76	1
5	3	3	-4.504782475	2
6	3	3	-12.9748966	0
7	3	3		2
8	3	3	-21.06486689	0
9	3	3	-2.381882077	1
10	3	3	23.84031487	0
11	3	3	-9.818863943	1
12	3	3	-2.567404427	1
13	3	3	30.67624959	2
14	3	3	5.068504665	1
15	3	3	17.79864163	2
16	3	3		1
17	3	3	-10.13149182	2
18	3	3	4.763188035	1
19	3	3	2.105263158	2
1	3	4	15.65836299	0
2	3	4	-0.4	1
3	3	4	-17.67756807	0
4	3	4	5	1
5	3	4	-11.848195	2
6	3	4	17.51466769	0
7	3	4		2
8	3	4	-23.17960255	0
9	3	4	28.5630613	1
10	3	4	-4.343547934	0
11	3	4	-17.61533501	1
12	3	4	-4.61167002	1
13	3	4	38.59849722	2
14	3	4	-1.941665966	1
15	3	4	9.38873352	2
16	3	4		1
17	3	4	-7.709772018	2
18	3	4	-13.37330728	1
19	3	4	-22.57309942	2
